# Supplementary material for: A signal-on electrochemical DNA biosensor based on exonuclease III-assisted recycling amplification
Source: Royal Society of Chemistry journal article supplement (doi:10.1039/d2ay01592g), 2022-01-01
Supplement: d2ay01592g1.pdf [file d2ay01592g1.pdf]

## Supporting Information

### **A signal-on electrochemical DNA biosensor based on exonuclease III-assisted recycling amplification**

Xiongtao Yu<sup>a</sup>, Bowen Jiang<sup>b</sup> and Lishi Wang<sup>a\*</sup>

<sup>a</sup>School of Chemistry and Chemical Engineering, South China University  
of Technology, Guangzhou 510641, China

<sup>b</sup>College of Biophotonics, South China Normal University, Guangzhou  
510631, China

\*Corresponding Authors: E-mail: wanglsh@scut.edu.cn

## Feasibility validation

In order to verify the feasibility of the sensor using Exo III-assisted signal amplification, we evaluated the conformations and molecular hybridization of pDNA and cDNA oligonucleotides using the NUPACK web server. The evaluation result showed that pDNA forms a stable hairpin structure in solution and the free energy of the secondary structure ( $E_{\text{free}}$ ) was -9.92 kcal/mol (Fig.S1A). pDNA hybridize with tDNA to form a more stable double-stranded structure with free energy ( $E_{\text{free}}$ ) was -22.02 kcal/mol, while Exo III could cleave its blunt 3' terminus (Fig. S1B). However, pDNA and cDNA cannot hybridize because they have the same number of base pairings. Alternatively, the remaining DNA and cDNA hybridize to form a stable double-stranded structure with free energy ( $E_{\text{free}}$ ) was -13.52 kcal/mol (Fig. S1C), which can facilitate successful anchoring of methylene blue at the electrode.

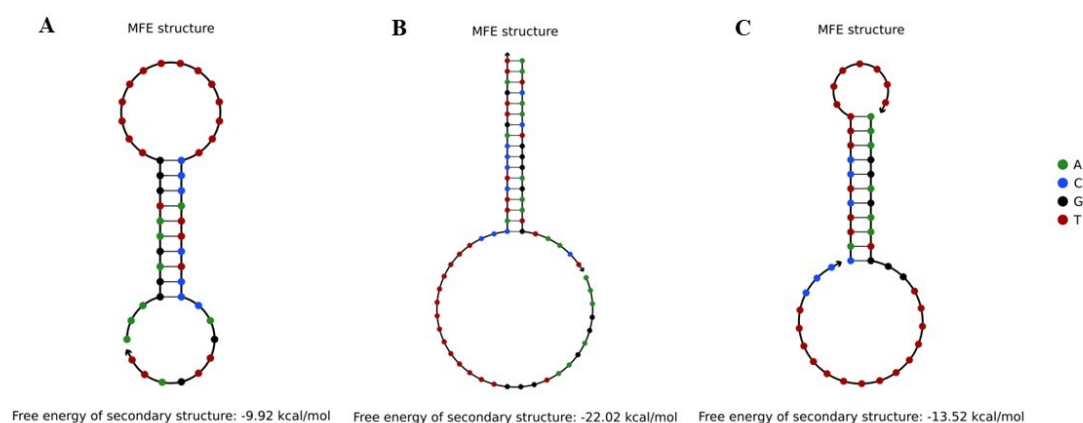

Fig. S1. The conformation and secondary structure free energy of oligonucleotide sequences were evaluated by NUPACK analysis : (A) pDNA; (B) pDNA+tDNA; (C) rDNA+ cDNA.

## Polyacrylamide Gel Electrophoresis

Electrophoresis experiment was performed by referencing the standard protocol to prove the target DNA -triggered digestion of probe DNA by Exo-III. PAGE (12%) in the  $1 \times$  TBE buffer for 80 min under a voltage of 100 V was used to test different samples. The results showed that the Exo III was able to specifically cleave the target/probe DNA duplex with 3' blunt end.

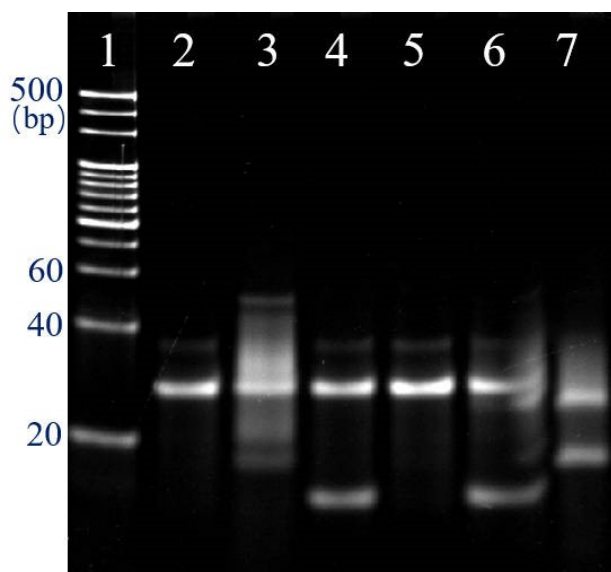

Fig. S2. The image of polyacrylamide gel electrophoresis of Exo III-assisted signal amplification. lane 1: 20 bp DNA ladder; lane 2: pDNA; lane 3: pDNA + tDNA; lane 4: pDNA + cDNA; lane 5: pDNA + Exo; lane 6: pDNA + cDNA + Exo III; lane 7: pDNA + tDNA + Exo III; Gel Red nucleic acid stain used in the experiment.

Table S1. Comparison of different methods for specificity

| Amplification strategy                  | Signal change ratio of mismatched DNA to T-DNA |            | Reference |
|-----------------------------------------|------------------------------------------------|------------|-----------|
|                                         | Sm-DNA (%)                                     | Tm-DNA (%) |           |
| Exo III T-AuNSs                         | 45                                             | -          | 1         |
| Exo III and HCR                         | 60                                             | 20         | 2         |
| Exo III                                 | 69                                             | 33         | 3         |
| eMB-DNA                                 | 49                                             | 26         | 4         |
| AuNPs/g-C3N4@rGO<br>biotin-streptavidin | 33                                             | 20         | 5         |
| CDs and GO                              | 41                                             | -          | 6         |
| AuNPs                                   | 62                                             | 51         | 7         |
| Exo III and AuNPs                       | 43                                             | 10         | This work |

Exo-III: Exonuclease III; HCR: hybridization chain reaction; eMB-DNA: electrochemical molecular beacon-based DNA; AuNPs: gold nanoparticles; g-C3N4:

graphitic carbon nitride; rGO: reduced graphene oxide; T-AuNSs: triangular Au nanosheets; CDs: carbon dots; GO: graphene oxide;

1. Zheng, X.; Li, L.; Zhang, L.; Xie, L.; Song, X.; Yu, J., Multiple self-cleaning paper-based electrochemical ratiometric biosensor based on the inner reference probe and exonuclease III-assisted signal amplification strategy. *Biosens Bioelectron* **2020**, *147*, 111769.
2. Ren, W.; Gao, Z. F.; Li, N. B.; Luo, H. Q., Ultrasensitive and selective signal-on electrochemical DNA detection via exonuclease III catalysis and hybridization chain reaction amplification. *Biosens Bioelectron* **2015**, *63*, 153-158.
3. Lin, C.; Wu, Y.; Luo, F.; Chen, D.; Chen, X., A label-free electrochemical DNA sensor using methylene blue as redox indicator based on an exonuclease III-aided target recycling strategy. *Biosens Bioelectron* **2014**, *59*, 365-9.
4. Xiong, E.; Li, Z.; Zhang, X.; Zhou, J.; Yan, X.; Liu, Y.; Chen, J., Triple-Helix Molecular Switch Electrochemical Ratiometric Biosensor for Ultrasensitive Detection of Nucleic Acids. *Anal Chem* **2017**, *89* (17), 8830-8835.
5. Zhu, Q.; Yang, H.; Luo, J.; Huang, H.; Fang, L.; Deng, J.; Li, C.; Li, Y.; Zeng, T.; Zheng, J., 3D matrixed DNA self-nanocatalyzer as electrochemical sensitizers for ultrasensitive investigation of DNA 5-methylcytosine. *Analytica Chimica Acta* **2021**, *1142*, 127-134.
6. Zhang, Z.-Y.; Huang, L.-X.; Xu, Z.-W.; Wang, P.; Lei, Y.; Liu, A.-L., Efficient Determination of PML/RAR alpha Fusion Gene by the Electrochemical DNA Biosensor Based on Carbon Dots/Graphene Oxide Nanocomposites. *International Journal of Nanomedicine* **2021**, *16*, 3497-3508.
7. Zhan, F.; Liao, X.; Wang, Q.; Sun, W., A subfemtomolar electrochemical DNA biosensor realized by in-situ grafting of gold nanoparticle/neutral red on the terminal of hairpin probe as the signal tag. *Microchemical Journal* **2021**, *164*.
